# Supplementary material
Source: publisher figshare collection journal article supplement (https://acs.figshare.com/ndownloader/files/7841524)
Supplement: Supplementary file 1 [file 7841524]

 
data_20150827_2 
  
_audit_creation_method            SHELXL-97 
_chemical_name_systematic 
; 
 ? 
; 
_chemical_name_common             ? 
_chemical_melting_point           ? 
_chemical_formula_moiety          ? 
_chemical_formula_sum 
 'C12 H28 Ge N2 S2 Se' 
_chemical_formula_weight          416.03 
  
loop_ 
 _atom_type_symbol 
 _atom_type_description 
 _atom_type_scat_dispersion_real 
 _atom_type_scat_dispersion_imag 
 _atom_type_scat_source 
 'C'  'C'   0.0033   0.0016 
 'International Tables Vol C Tables 4.2.6.8 and 6.1.1.4' 
 'H'  'H'   0.0000   0.0000 
 'International Tables Vol C Tables 4.2.6.8 and 6.1.1.4' 
 'N'  'N'   0.0061   0.0033 
 'International Tables Vol C Tables 4.2.6.8 and 6.1.1.4' 
 'S'  'S'   0.1246   0.1234 
 'International Tables Vol C Tables 4.2.6.8 and 6.1.1.4' 
 'Ge'  'Ge'   0.1547   1.8001 
 'International Tables Vol C Tables 4.2.6.8 and 6.1.1.4' 
 'Se'  'Se'  -0.0929   2.2259 
 'International Tables Vol C Tables 4.2.6.8 and 6.1.1.4' 
  
_symmetry_cell_setting            Monoclinic 
_symmetry_space_group_name_H-M    P2(1)/n 
  
loop_ 
 _symmetry_equiv_pos_as_xyz 
 'x, y, z' 
 '-x+1/2, y+1/2, -z+1/2' 
 '-x, -y, -z' 
 'x-1/2, -y-1/2, z-1/2' 
  
_cell_length_a                    7.8523(3) 
_cell_length_b                    19.3130(6) 
_cell_length_c                    12.2445(4) 
_cell_angle_alpha                 90.00 
_cell_angle_beta                  106.469(2) 
_cell_angle_gamma                 90.00 
_cell_volume                      1780.71(11) 
_cell_formula_units_Z             4 
_cell_measurement_temperature     296(1) 
_cell_measurement_reflns_used     9851 
_cell_measurement_theta_min       2.77 
_cell_measurement_theta_max       28.17 
  
_exptl_crystal_description        block 
_exptl_crystal_colour             yellow 
_exptl_crystal_size_max           0.38 
_exptl_crystal_size_mid           0.30 
_exptl_crystal_size_min           0.22 
_exptl_crystal_density_meas       none
_exptl_crystal_density_diffrn     1.552 
_exptl_crystal_density_method     'not measured' 
_exptl_crystal_F_000              848 
_exptl_absorpt_coefficient_mu     3.987 
_exptl_absorpt_correction_type    multi-scan 
_exptl_absorpt_correction_T_min   0.3126 
_exptl_absorpt_correction_T_max   0.4742 
_exptl_absorpt_process_details    'Bruker SADABS' 
  
_exptl_special_details 
; 
 ? 
; 
  
_diffrn_ambient_temperature       296(1) 
_diffrn_radiation_wavelength      0.71073 
_diffrn_radiation_type            MoK\a 
_diffrn_radiation_source          'fine-focus sealed tube' 
_diffrn_radiation_monochromator   graphite 
_diffrn_measurement_device_type   'Bruker APEX-II CCD' 
_diffrn_measurement_method        '\f and \w scans' 
_diffrn_detector_area_resol_mean  ? 
_diffrn_reflns_number             33044 
_diffrn_reflns_av_R_equivalents   0.0252 
_diffrn_reflns_av_sigmaI/netI     0.0146 
_diffrn_reflns_limit_h_min        -10 
_diffrn_reflns_limit_h_max        10 
_diffrn_reflns_limit_k_min        -25 
_diffrn_reflns_limit_k_max        25 
_diffrn_reflns_limit_l_min        -16 
_diffrn_reflns_limit_l_max        16 
_diffrn_reflns_theta_min          2.03 
_diffrn_reflns_theta_max          28.45 
_reflns_number_total              4485 
_reflns_number_gt                 3974 
_reflns_threshold_expression      >2sigma(I) 
  
_computing_data_collection        'Bruker APEX2' 
_computing_cell_refinement        'Bruker SAINT' 
_computing_data_reduction         'Bruker SAINT' 
_computing_structure_solution     'SHELXS-97 (Sheldrick, 2008)' 
_computing_structure_refinement   'SHELXL-97 (Sheldrick, 2008)' 
_computing_molecular_graphics     'Bruker SHELXTL' 
_computing_publication_material   'Bruker SHELXTL' 
  
_refine_special_details 
; 
 Refinement of F^2^ against ALL reflections.  The weighted R-factor wR and 
 goodness of fit S are based on F^2^, conventional R-factors R are based 
 on F, with F set to zero for negative F^2^. The threshold expression of 
 F^2^ > 2sigma(F^2^) is used only for calculating R-factors(gt) etc. and is 
 not relevant to the choice of reflections for refinement.  R-factors based 
 on F^2^ are statistically about twice as large as those based on F, and R- 
 factors based on ALL data will be even larger. 
; 
  
_refine_ls_structure_factor_coef  Fsqd 
_refine_ls_matrix_type            full 
_refine_ls_weighting_scheme       calc 
_refine_ls_weighting_details 
 'calc w=1/[\s^2^(Fo^2^)+(0.0250P)^2^+0.5118P] where P=(Fo^2^+2Fc^2^)/3' 
_atom_sites_solution_primary      direct 
_atom_sites_solution_secondary    difmap 
_atom_sites_solution_hydrogens    geom 
_refine_ls_hydrogen_treatment     refxyz 
_refine_ls_extinction_method      SHELXL 
_refine_ls_extinction_coef        0.0138(4) 
_refine_ls_extinction_expression 
 'Fc^*^=kFc[1+0.001xFc^2^\l^3^/sin(2\q)]^-1/4^' 
_refine_ls_number_reflns          4485 
_refine_ls_number_parameters      164 
_refine_ls_number_restraints      1 
_refine_ls_R_factor_all           0.0237 
_refine_ls_R_factor_gt            0.0193 
_refine_ls_wR_factor_ref          0.0507 
_refine_ls_wR_factor_gt           0.0490 
_refine_ls_goodness_of_fit_ref    1.044 
_refine_ls_restrained_S_all       1.044 
_refine_ls_shift/su_max           0.002 
_refine_ls_shift/su_mean          0.000 
  
loop_ 
 _atom_site_label 
 _atom_site_type_symbol 
 _atom_site_fract_x 
 _atom_site_fract_y 
 _atom_site_fract_z 
 _atom_site_U_iso_or_equiv 
 _atom_site_adp_type 
 _atom_site_occupancy 
 _atom_site_symmetry_multiplicity 
 _atom_site_calc_flag 
 _atom_site_refinement_flags 
 _atom_site_disorder_assembly 
 _atom_site_disorder_group 
Se1 Se 0.92449(3) 0.155971(10) 0.881439(14) 0.04611(6) Uani 1 1 d . . . 
Ge1 Ge 0.921102(19) 0.111903(8) 0.711083(12) 0.02812(6) Uani 1 1 d U . . 
S1 S 1.09343(5) 0.15535(2) 0.61029(4) 0.03945(10) Uani 1 1 d . . . 
S2 S 0.75659(5) 0.01826(2) 0.64338(3) 0.03887(10) Uani 1 1 d U . . 
N1 N 0.71677(16) 0.17806(7) 0.59724(11) 0.0341(3) Uani 1 1 d . . . 
N2 N 1.13676(17) 0.02786(7) 0.77067(11) 0.0331(3) Uani 1 1 d . . . 
C1 C 0.9904(2) 0.24152(8) 0.57437(14) 0.0362(3) Uani 1 1 d . . . 
C2 C 0.8107(2) 0.24505(8) 0.60212(15) 0.0364(3) Uani 1 1 d . . . 
H2A H 0.8309 0.2642 0.6779 0.044 Uiso 1 1 calc R . . 
H2B H 0.7337 0.2768 0.5491 0.044 Uiso 1 1 calc R . . 
C3 C 0.9740(3) 0.25529(11) 0.44879(17) 0.0562(5) Uani 1 1 d . . . 
H3A H 0.9208 0.2999 0.4276 0.084 Uiso 1 1 calc R . . 
H3B H 0.9012 0.2202 0.4028 0.084 Uiso 1 1 calc R . . 
H3C H 1.0899 0.2545 0.4372 0.084 Uiso 1 1 calc R . . 
C4 C 1.1121(3) 0.29617(11) 0.6464(2) 0.0641(6) Uani 1 1 d . . . 
H4A H 1.0595 0.3411 0.6282 0.096 Uiso 1 1 calc R . . 
H4B H 1.2251 0.2951 0.6307 0.096 Uiso 1 1 calc R . . 
H4C H 1.1283 0.2866 0.7256 0.096 Uiso 1 1 calc R . . 
C5 C 0.6555(2) 0.15064(9) 0.47996(15) 0.0467(4) Uani 1 1 d . . . 
H5A H 0.5671 0.1810 0.4340 0.070 Uiso 1 1 calc R . . 
H5B H 0.6053 0.1054 0.4811 0.070 Uiso 1 1 calc R . . 
H5C H 0.7543 0.1477 0.4486 0.070 Uiso 1 1 calc R . . 
C6 C 0.5606(2) 0.18846(11) 0.64087(19) 0.0534(5) Uani 1 1 d . . . 
H6A H 0.4754 0.2174 0.5891 0.080 Uiso 1 1 calc R . . 
H6B H 0.5978 0.2102 0.7143 0.080 Uiso 1 1 calc R . . 
H6C H 0.5075 0.1445 0.6474 0.080 Uiso 1 1 calc R . . 
C7 C 0.8590(2) -0.04405(8) 0.75802(14) 0.0373(3) Uani 1 1 d . . . 
C8 C 1.0445(2) -0.02017(8) 0.82869(14) 0.0373(3) Uani 1 1 d . . . 
H8A H 1.0331 0.0022 0.8972 0.045 Uiso 1 1 calc R . . 
H8B H 1.1185 -0.0608 0.8520 0.045 Uiso 1 1 calc R . . 
C9 C 0.7417(3) -0.04936(11) 0.83804(18) 0.0553(5) Uani 1 1 d . . . 
H9A H 0.7933 -0.0816 0.8979 0.083 Uiso 1 1 calc R . . 
H9B H 0.6256 -0.0651 0.7962 0.083 Uiso 1 1 calc R . . 
H9C H 0.7325 -0.0047 0.8703 0.083 Uiso 1 1 calc R . . 
C10 C 0.8644(3) -0.11438(9) 0.70134(19) 0.0565(5) Uani 1 1 d . . . 
H10A H 0.9171 -0.1481 0.7585 0.085 Uiso 1 1 calc R . . 
H10B H 0.9337 -0.1107 0.6484 0.085 Uiso 1 1 calc R . . 
H10C H 0.7457 -0.1284 0.6616 0.085 Uiso 1 1 calc R . . 
C11 C 1.1890(3) -0.00615(10) 0.67701(16) 0.0462(4) Uani 1 1 d . . . 
H11A H 1.2786 -0.0403 0.7079 0.069 Uiso 1 1 calc R . . 
H11B H 1.2352 0.0279 0.6358 0.069 Uiso 1 1 calc R . . 
H11C H 1.0872 -0.0281 0.6265 0.069 Uiso 1 1 calc R . . 
C12 C 1.2977(2) 0.05498(10) 0.85408(16) 0.0464(4) Uani 1 1 d . . . 
H12A H 1.3838 0.0186 0.8766 0.070 Uiso 1 1 calc R . . 
H12B H 1.2672 0.0721 0.9197 0.070 Uiso 1 1 calc R . . 
H12C H 1.3467 0.0919 0.8201 0.070 Uiso 1 1 calc R . . 
  
loop_ 
 _atom_site_aniso_label 
 _atom_site_aniso_U_11 
 _atom_site_aniso_U_22 
 _atom_site_aniso_U_33 
 _atom_site_aniso_U_23 
 _atom_site_aniso_U_13 
 _atom_site_aniso_U_12 
Se1 0.05406(12) 0.04987(11) 0.03438(10) -0.01116(7) 0.01253(8) 0.00598(8) 
Ge1 0.02799(8) 0.02952(9) 0.02748(9) -0.00078(6) 0.00888(6) 0.00017(6) 
S1 0.03327(19) 0.0389(2) 0.0523(2) 0.01394(17) 0.02202(18) 0.01008(15) 
S2 0.0399(2) 0.03392(19) 0.0360(2) 0.00170(16) -0.00032(16) -0.00460(16) 
N1 0.0263(6) 0.0363(7) 0.0393(7) 0.0047(5) 0.0086(5) 0.0046(5) 
N2 0.0327(6) 0.0332(6) 0.0333(6) 0.0002(5) 0.0093(5) 0.0040(5) 
C1 0.0356(8) 0.0300(7) 0.0451(9) 0.0043(6) 0.0149(7) 0.0033(6) 
C2 0.0346(8) 0.0308(7) 0.0449(9) 0.0029(6) 0.0130(7) 0.0065(6) 
C3 0.0692(13) 0.0510(11) 0.0575(12) 0.0225(9) 0.0325(10) 0.0156(10) 
C4 0.0471(11) 0.0495(11) 0.0966(17) -0.0174(11) 0.0217(11) -0.0103(9) 
C5 0.0448(9) 0.0449(9) 0.0408(9) 0.0051(7) -0.0033(7) -0.0007(7) 
C6 0.0309(8) 0.0603(12) 0.0740(13) 0.0128(10) 0.0230(9) 0.0120(8) 
C7 0.0428(8) 0.0311(7) 0.0368(8) 0.0047(6) 0.0092(7) -0.0010(6) 
C8 0.0412(8) 0.0351(8) 0.0337(8) 0.0063(6) 0.0077(6) 0.0033(6) 
C9 0.0520(11) 0.0609(12) 0.0569(12) 0.0147(10) 0.0217(9) -0.0036(9) 
C10 0.0654(12) 0.0330(9) 0.0652(13) -0.0028(8) 0.0090(10) -0.0025(8) 
C11 0.0502(10) 0.0444(9) 0.0493(10) -0.0015(8) 0.0227(8) 0.0126(8) 
C12 0.0348(8) 0.0495(10) 0.0489(10) 0.0007(8) 0.0023(7) 0.0013(7) 
  
_geom_special_details 
; 
 All esds (except the esd in the dihedral angle between two l.s. planes) 
 are estimated using the full covariance matrix.  The cell esds are taken 
 into account individually in the estimation of esds in distances, angles 
 and torsion angles; correlations between esds in cell parameters are only 
 used when they are defined by crystal symmetry.  An approximate (isotropic) 
 treatment of cell esds is used for estimating esds involving l.s. planes. 
; 
  
loop_ 
 _geom_bond_atom_site_label_1 
 _geom_bond_atom_site_label_2 
 _geom_bond_distance 
 _geom_bond_site_symmetry_2 
 _geom_bond_publ_flag 
Se1 Ge1 2.2460(2) . ? 
Ge1 N1 2.2095(12) . ? 
Ge1 S1 2.2373(4) . ? 
Ge1 S2 2.2405(4) . ? 
Ge1 N2 2.3096(12) . ? 
S1 C1 1.8484(16) . ? 
S2 C7 1.8509(16) . ? 
N1 C5 1.477(2) . ? 
N1 C2 1.482(2) . ? 
N1 C6 1.483(2) . ? 
N2 C8 1.477(2) . ? 
N2 C11 1.477(2) . ? 
N2 C12 1.477(2) . ? 
C1 C4 1.526(3) . ? 
C1 C3 1.530(2) . ? 
C1 C2 1.543(2) . ? 
C2 H2A 0.9700 . ? 
C2 H2B 0.9700 . ? 
C3 H3A 0.9600 . ? 
C3 H3B 0.9600 . ? 
C3 H3C 0.9600 . ? 
C4 H4A 0.9600 . ? 
C4 H4B 0.9600 . ? 
C4 H4C 0.9600 . ? 
C5 H5A 0.9600 . ? 
C5 H5B 0.9600 . ? 
C5 H5C 0.9600 . ? 
C6 H6A 0.9600 . ? 
C6 H6B 0.9600 . ? 
C6 H6C 0.9600 . ? 
C7 C9 1.527(2) . ? 
C7 C10 1.531(2) . ? 
C7 C8 1.539(2) . ? 
C8 H8A 0.9700 . ? 
C8 H8B 0.9700 . ? 
C9 H9A 0.9600 . ? 
C9 H9B 0.9600 . ? 
C9 H9C 0.9600 . ? 
C10 H10A 0.9600 . ? 
C10 H10B 0.9600 . ? 
C10 H10C 0.9600 . ? 
C11 H11A 0.9600 . ? 
C11 H11B 0.9600 . ? 
C11 H11C 0.9600 . ? 
C12 H12A 0.9600 . ? 
C12 H12B 0.9600 . ? 
C12 H12C 0.9600 . ? 
  
loop_ 
 _geom_angle_atom_site_label_1 
 _geom_angle_atom_site_label_2 
 _geom_angle_atom_site_label_3 
 _geom_angle 
 _geom_angle_site_symmetry_1 
 _geom_angle_site_symmetry_3 
 _geom_angle_publ_flag 
N1 Ge1 S1 83.09(4) . . ? 
N1 Ge1 S2 89.65(4) . . ? 
S1 Ge1 S2 118.298(18) . . ? 
N1 Ge1 Se1 100.49(4) . . ? 
S1 Ge1 Se1 121.364(15) . . ? 
S2 Ge1 Se1 120.218(14) . . ? 
N1 Ge1 N2 160.39(5) . . ? 
S1 Ge1 N2 86.21(3) . . ? 
S2 Ge1 N2 81.01(3) . . ? 
Se1 Ge1 N2 99.11(3) . . ? 
C1 S1 Ge1 100.16(5) . . ? 
C7 S2 Ge1 99.39(5) . . ? 
C5 N1 C2 111.92(13) . . ? 
C5 N1 C6 108.90(14) . . ? 
C2 N1 C6 108.67(13) . . ? 
C5 N1 Ge1 112.59(10) . . ? 
C2 N1 Ge1 102.43(9) . . ? 
C6 N1 Ge1 112.19(11) . . ? 
C8 N2 C11 112.10(13) . . ? 
C8 N2 C12 109.28(13) . . ? 
C11 N2 C12 108.84(14) . . ? 
C8 N2 Ge1 100.23(9) . . ? 
C11 N2 Ge1 114.04(10) . . ? 
C12 N2 Ge1 112.09(10) . . ? 
C4 C1 C3 108.72(16) . . ? 
C4 C1 C2 107.72(14) . . ? 
C3 C1 C2 113.10(14) . . ? 
C4 C1 S1 108.97(13) . . ? 
C3 C1 S1 107.57(12) . . ? 
C2 C1 S1 110.69(10) . . ? 
N1 C2 C1 115.35(12) . . ? 
N1 C2 H2A 108.4 . . ? 
C1 C2 H2A 108.4 . . ? 
N1 C2 H2B 108.4 . . ? 
C1 C2 H2B 108.4 . . ? 
H2A C2 H2B 107.5 . . ? 
C1 C3 H3A 109.5 . . ? 
C1 C3 H3B 109.5 . . ? 
H3A C3 H3B 109.5 . . ? 
C1 C3 H3C 109.5 . . ? 
H3A C3 H3C 109.5 . . ? 
H3B C3 H3C 109.5 . . ? 
C1 C4 H4A 109.5 . . ? 
C1 C4 H4B 109.5 . . ? 
H4A C4 H4B 109.5 . . ? 
C1 C4 H4C 109.5 . . ? 
H4A C4 H4C 109.5 . . ? 
H4B C4 H4C 109.5 . . ? 
N1 C5 H5A 109.5 . . ? 
N1 C5 H5B 109.5 . . ? 
H5A C5 H5B 109.5 . . ? 
N1 C5 H5C 109.5 . . ? 
H5A C5 H5C 109.5 . . ? 
H5B C5 H5C 109.5 . . ? 
N1 C6 H6A 109.5 . . ? 
N1 C6 H6B 109.5 . . ? 
H6A C6 H6B 109.5 . . ? 
N1 C6 H6C 109.5 . . ? 
H6A C6 H6C 109.5 . . ? 
H6B C6 H6C 109.5 . . ? 
C9 C7 C10 109.29(16) . . ? 
C9 C7 C8 107.84(15) . . ? 
C10 C7 C8 112.19(15) . . ? 
C9 C7 S2 108.58(12) . . ? 
C10 C7 S2 107.15(12) . . ? 
C8 C7 S2 111.72(11) . . ? 
N2 C8 C7 115.65(13) . . ? 
N2 C8 H8A 108.4 . . ? 
C7 C8 H8A 108.4 . . ? 
N2 C8 H8B 108.4 . . ? 
C7 C8 H8B 108.4 . . ? 
H8A C8 H8B 107.4 . . ? 
C7 C9 H9A 109.5 . . ? 
C7 C9 H9B 109.5 . . ? 
H9A C9 H9B 109.5 . . ? 
C7 C9 H9C 109.5 . . ? 
H9A C9 H9C 109.5 . . ? 
H9B C9 H9C 109.5 . . ? 
C7 C10 H10A 109.5 . . ? 
C7 C10 H10B 109.5 . . ? 
H10A C10 H10B 109.5 . . ? 
C7 C10 H10C 109.5 . . ? 
H10A C10 H10C 109.5 . . ? 
H10B C10 H10C 109.5 . . ? 
N2 C11 H11A 109.5 . . ? 
N2 C11 H11B 109.5 . . ? 
H11A C11 H11B 109.5 . . ? 
N2 C11 H11C 109.5 . . ? 
H11A C11 H11C 109.5 . . ? 
H11B C11 H11C 109.5 . . ? 
N2 C12 H12A 109.5 . . ? 
N2 C12 H12B 109.5 . . ? 
H12A C12 H12B 109.5 . . ? 
N2 C12 H12C 109.5 . . ? 
H12A C12 H12C 109.5 . . ? 
H12B C12 H12C 109.5 . . ? 
  
loop_ 
 _geom_torsion_atom_site_label_1 
 _geom_torsion_atom_site_label_2 
 _geom_torsion_atom_site_label_3 
 _geom_torsion_atom_site_label_4 
 _geom_torsion 
 _geom_torsion_site_symmetry_1 
 _geom_torsion_site_symmetry_2 
 _geom_torsion_site_symmetry_3 
 _geom_torsion_site_symmetry_4 
 _geom_torsion_publ_flag 
N1 Ge1 S1 C1 30.70(7) . . . . ? 
S2 Ge1 S1 C1 116.56(6) . . . . ? 
Se1 Ge1 S1 C1 -67.40(6) . . . . ? 
N2 Ge1 S1 C1 -165.77(7) . . . . ? 
N1 Ge1 S2 C7 -161.80(7) . . . . ? 
S1 Ge1 S2 C7 116.24(6) . . . . ? 
Se1 Ge1 S2 C7 -59.84(6) . . . . ? 
N2 Ge1 S2 C7 35.52(6) . . . . ? 
S1 Ge1 N1 C5 72.58(11) . . . . ? 
S2 Ge1 N1 C5 -46.00(11) . . . . ? 
Se1 Ge1 N1 C5 -166.71(10) . . . . ? 
N2 Ge1 N1 C5 15.2(2) . . . . ? 
S1 Ge1 N1 C2 -47.80(9) . . . . ? 
S2 Ge1 N1 C2 -166.37(9) . . . . ? 
Se1 Ge1 N1 C2 72.92(9) . . . . ? 
N2 Ge1 N1 C2 -105.21(16) . . . . ? 
S1 Ge1 N1 C6 -164.15(12) . . . . ? 
S2 Ge1 N1 C6 77.28(12) . . . . ? 
Se1 Ge1 N1 C6 -43.43(12) . . . . ? 
N2 Ge1 N1 C6 138.44(15) . . . . ? 
N1 Ge1 N2 C8 -113.52(15) . . . . ? 
S1 Ge1 N2 C8 -170.48(9) . . . . ? 
S2 Ge1 N2 C8 -51.04(9) . . . . ? 
Se1 Ge1 N2 C8 68.34(9) . . . . ? 
N1 Ge1 N2 C11 6.4(2) . . . . ? 
S1 Ge1 N2 C11 -50.54(11) . . . . ? 
S2 Ge1 N2 C11 68.90(11) . . . . ? 
Se1 Ge1 N2 C11 -171.71(11) . . . . ? 
N1 Ge1 N2 C12 130.67(15) . . . . ? 
S1 Ge1 N2 C12 73.71(11) . . . . ? 
S2 Ge1 N2 C12 -166.85(11) . . . . ? 
Se1 Ge1 N2 C12 -47.47(11) . . . . ? 
Ge1 S1 C1 C4 106.30(13) . . . . ? 
Ge1 S1 C1 C3 -136.01(12) . . . . ? 
Ge1 S1 C1 C2 -11.98(12) . . . . ? 
C5 N1 C2 C1 -67.30(17) . . . . ? 
C6 N1 C2 C1 172.40(14) . . . . ? 
Ge1 N1 C2 C1 53.54(15) . . . . ? 
C4 C1 C2 N1 -146.77(16) . . . . ? 
C3 C1 C2 N1 93.06(17) . . . . ? 
S1 C1 C2 N1 -27.74(18) . . . . ? 
Ge1 S2 C7 C9 99.50(12) . . . . ? 
Ge1 S2 C7 C10 -142.57(12) . . . . ? 
Ge1 S2 C7 C8 -19.32(12) . . . . ? 
C11 N2 C8 C7 -68.52(18) . . . . ? 
C12 N2 C8 C7 170.73(14) . . . . ? 
Ge1 N2 C8 C7 52.82(14) . . . . ? 
C9 C7 C8 N2 -143.04(15) . . . . ? 
C10 C7 C8 N2 96.56(17) . . . . ? 
S2 C7 C8 N2 -23.79(18) . . . . ? 
  
_diffrn_measured_fraction_theta_max    0.995 
_diffrn_reflns_theta_full              28.46 
_diffrn_measured_fraction_theta_full   0.995 
_refine_diff_density_max    0.472 
_refine_diff_density_min   -0.485 
_refine_diff_density_rms    0.047 
